# Supplementary material
Source: HighWire-hosted journal article supplement (https://care.diabetesjournals.org/content/suppl/2006/03/01/29.3.631)
Supplement: dc0679OnlineAppendixB.pdf [file dc0679OnlineAppendixB.pdf]

## Online Appendix B

Table. Summary of published results for bivariate genetic analysis of metabolic syndrome-related traits for which  $\rho_g$  was significantly different from zero

| Trait Pair or Group         | Statistical Method         | $h_1^2 / h_2^2$ | $\rho_g$  | Study Population (reference number)                                     |
|-----------------------------|----------------------------|-----------------|-----------|-------------------------------------------------------------------------|
| BMI, IR, TG, HDL-C, and SBP | Structural-equation models | Not reported    | 6% - 52%* | 289 Swedish twin pairs (1)                                              |
| BMI/TG                      | Variance-components models | 0.36/0.27       | 0.29      | 537 adults from 89 healthy white families in UK (2)                     |
| BMI/SBP                     | Variance-components models | 0.359/0.300     | 0.146     | 5376 individuals from 2184 households in Italy (3)                      |
| BMI/SBP                     | Path analysis              | 0.54/0.57       | 14.0%†    | 331 individuals of 73 Hispanic families with a hypertensive proband (4) |
| BMI/SBP                     | Variance-components models | 0.36/0.29       | 0.63      | 537 adults from 89 healthy white families in UK (2)                     |
| BMI/DBP                     | Variance-components models | 0.359/0.175     | 0.286     | 5376 individuals from 2184 households in Italy (3)                      |
| BMI/URIC                    | Variance-components models | 0.359/0.214     | 0.234     | 5376 individuals from 2184 households in Italy (3)                      |
| BMI/Glucose                 | Variance-components models | 0.359/0.160     | 0.307     | 5376 individuals from 2184 households in Italy (3)                      |
| Insulin/BMI                 | Variance-components models | 0.442/0.530     | 0.486     | 767 nondiabetic individuals from 41 Mexican-American families (5)       |
| Insulin/TG                  | Variance-components models | 0.442/0.498     | 0.297     | 767 nondiabetic individuals from 41 Mexican-American families (5)       |
| Insulin/HDL-C               | Variance-components models | 0.442/0.543     | -0.356    | 767 nondiabetic individuals from 41 Mexican-American families (5)       |
| Insulin/HDL-C               | Variance-components models | 0.42/0.47       | -0.334    | 1116 nondiabetic individuals from 42 Mexican-American families (6)      |
| PAI-1/TG                    | Structural-equation models | 0.42/0.38       | 1.00      | 217 Swedish twin pairs (7)                                              |
| PAI-1/TG                    | Variance-components models | 0.27/0.27       | 0.59      | 537 adults from 89 healthy white families in UK (2)                     |
| PAI-1/BMI                   | Structural-equation models | 0.42/0.30       | 0.63      | 217 Swedish twin pairs (7)                                              |
| PAI-1/BMI                   | Variance-components models | 0.27/0.36       | 0.49      | 537 adults from 89 healthy white families in UK (2)                     |
| PAI-1/WHR                   | Variance-components models | 0.27/0.15       | 0.42      | 537 adults from 89 healthy white families in UK (2)                     |
| PAI-1/SBP                   | Variance-components models | 0.27/0.29       | 0.61      | 537 adults from 89 healthy white families in UK (2)                     |
| PAI-1/CRP                   | Variance-components models | 0.24/0.46       | 0.46      | 1294 American Indian relative pairs (8)                                 |
| ICAM-1/Insulin              | Variance-components models | 0.56/0.43       | 0.45      | 428 adults from 20 extended Mexican-American families (9)               |
| ICAM-1/BMI                  | Variance-components models | 0.56/0.50       | 0.32      | 428 adults from 20 extended Mexican-American families (9)               |
| ICAM-1/Waist                | Variance-components models | 0.56/0.43       | 0.45      | 428 adults from 20 extended Mexican-American families (9)               |

\*Common genetic factors accounted for 6% (SBP) to 52% (BMI) of variation in these traits (genetic correlations were not reported);

†14.0% of variation in SBP was accounted for by heritable effects related to BMI;

$h_1^2$  = heritability for trait 1;  $h_2^2$  = heritability for trait 2;  $\rho_g$  = additive genetic correlation unless otherwise explained;

IR = insulin resistance represented by the homeostasis model assessment index; WHR = waist-hip ratio; ICAM-1 = endothelial intercellular adhesion molecular-1;

See table 2 of the paper for abbreviations of other variables.

## References

1. Hong Y, Pedersen NL, Brisman K, de Faire U: Genetic and environmental architecture of the features of the insulin-resistance syndrome. *Am J Hum Genet* 60:143-152, 1997
2. Freeman MS, Mansfield MW, Barrett JH, Grant PJ: Insulin resistance: an atherothrombotic syndrome. The Leeds family study. *Thromb Haemost* 89:161-168, 2003
3. Schork NJ, Weder AB, Trevisan M, Laurenzi M: The contribution of pleiotropy to blood pressure and body-mass index variation: the Gubbio Study. *Am J Hum Genet* 54:361-373, 1994
4. Xiang AH, Azen SP, Raffel LJ, Tan S, Cheng LS, Diaz J, Toscano E, Henderson PC, Hodis HN, Hsueh WA, Rotter JI, Buchanan TA: Evidence for joint genetic control of insulin sensitivity and systolic blood pressure in hispanic families with a hypertensive proband. *Circulation* 103:78-83, 2001

5. Mitchell BD, Kammerer CM, Mahaney MC, Blangero J, Comuzzie AG, Atwood LD, Haffner SM, Stern MP, MacCluer JW: Genetic analysis of the IRS. Pleiotropic effects of genes influencing insulin levels on lipoprotein and obesity measures. *Arterioscler Thromb Vasc Biol* 16:281-288, 1996
6. Rainwater DL, Mitchell BD, Mahaney MC, Haffner SM: Genetic relationship between measures of HDL phenotypes and insulin concentrations. *Arterioscler Thromb Vasc Biol* 17:3414-3419, 1997
7. Hong Y, Pedersen NL, Egberg N, de Faire U: Moderate genetic influences on plasma levels of plasminogen activator inhibitor-1 and evidence of genetic and environmental influences shared by plasminogen activator inhibitor-1, triglycerides, and body mass index. *Arterioscler Thromb Vasc Biol* 17:2776-2782, 1997
8. Best LG, North KE, Tracy RP, Lee ET, Howard BV, Palmieri V, Maccluer JW: Genetic determination of acute phase reactant levels: the strong heart study. *Hum Hered* 58:112-116, 2004
9. Kent JW, Jr., Comuzzie AG, Mahaney MC, Almasy L, Rainwater DL, VandeBerg JL, MacCluer JW, Blangero J: Intercellular adhesion molecule-1 concentration is genetically correlated with insulin resistance, obesity, and HDL concentration in Mexican Americans. *Diabetes* 53:2691-2695, 2004
